# Supplementary material for: Unattended Electric Weeder (UEW): A Novel Approach to Control Floor Weeds in Orchard Nurseries
Source: MDPI journal article supplement (doi:10.3390/agronomy13071954), 2023-07-24
Supplement: s1 [file s1]

**Figure S3**

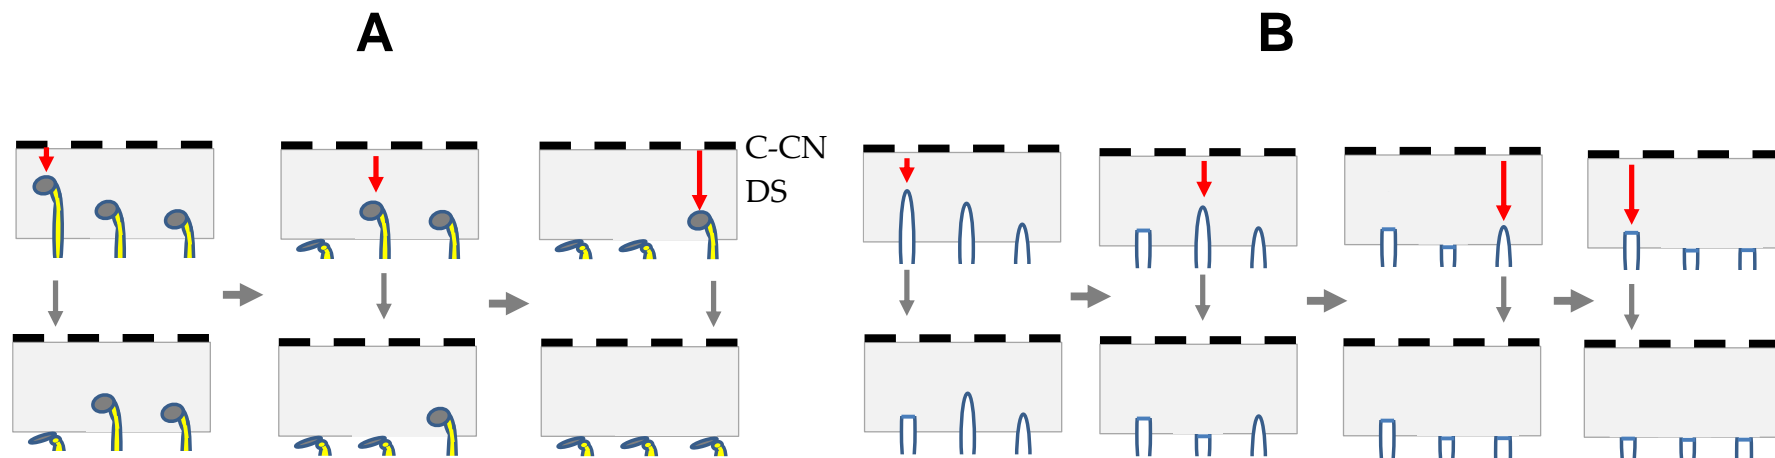

**Figure S3.** Exposing three white clover (A) and wild oat (B) seedlings to a spark generated by a charged conductor net (C-CN). The seedlings in the discharge space (DS) were subjected to the spark from the C-CN. The white clover seedlings were subjected to the spark one by one in order of height (from the tallest), whereas the tallest wild oat seedlings were exposed to the spark first, followed by the smaller seedlings when its height became lower than the second and third seedlings, and finally returned to the first seedling. This pattern of spark exposure continued until all seedlings were short of the discharge space.
