# Supplementary material for: Unattended Electric Weeder (UEW): A Novel Approach to Control Floor Weeds in Orchard Nurseries
Source: MDPI journal article supplement (doi:10.3390/agronomy13071954), 2023-07-24
Supplement: s1 [file s1]

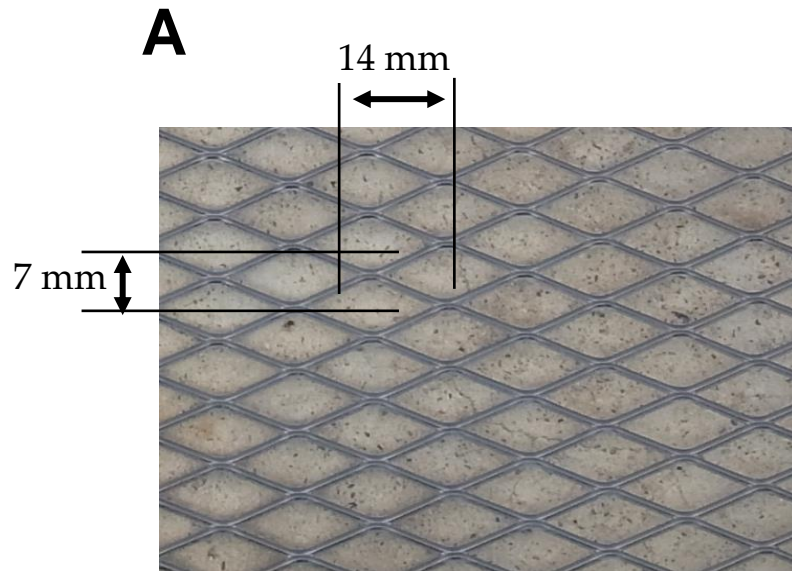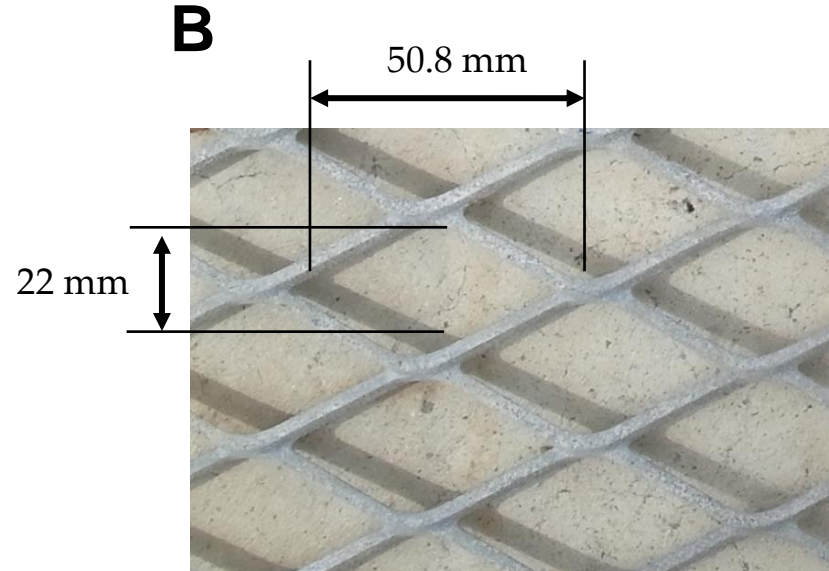

**Figure S1.** The two expanded stainless nets were used for the present study. (A) An expanded metal net with small diamond-shaped mesh (strand thickness, 0.8 mm) was lined to a voltage amplifier and used as a charged conductor net. (B) An expanded metal net with large diamond-shaped mesh (strand thickness, 2 mm) was laid on the floor as a soil-cover net to make a flat surface.
